# Supplementary material for: Biological maturation, anthropometric, and physical fitness variables of youth breaking athletes with different competition levels
Source: PeerJ. 2025 Nov 26;13:e20383. doi: 10.7717/peerj.20383 (PMC12664329; doi:10.7717/peerj.20383)
Supplement: Supplemental Information 1 [file peerj-13-20383-s001.xlsx]

## Sheet: Sheet1
ID	age	group	maturity offset	APHV	Maturity Status Group	Maturity Status Group	height	weight	body mass fat	BMI	sitting height	leg length	Hexagonal obstacle jump (s)	T test (s)	Illinois test (s)	Standing long jump (m)	30m sprint (s)	30s bodyweight squat (reps)	30s push up (reps)	Pull up (reps)	1 minute sit-up (reps)	400m run (s)	1500m run (s)	level
1	16.56	u18	1.86352	14.6965	post	3	176.3	73.52	0.105	0.208508	94.2	82.1	6.72	11	17.63	2.59	4.61	32	55	3	58	63	444	1
2	17.43	u18	1.62491	15.8051	post	3	164.9	53.8	0.115	0.163129	89.2	75.7	6.26	11.45	17.05	2.73	4.55	40	45	15	51	77.32	389	1
3	17.34	u18	1.83119	15.5088	post	3	169.6	76.9	0.232	0.22671	91	78.6	6.6	11.14	17.65	2.49	4.9	33	45	0	50	75	500	1
4	15.29	u18	0.259826	15.0302	circum	3	160.9	59.5	0.142	0.184897	87.2	73.7	7.06	10.77	18.46	2.69	4.8	37	56	5	49	82	500	1
5	17.74	u18	2.07396	15.666	post	2	165.8	65.2	0.09	0.196622	91.1	74.7	6.56	11.26	17.25	2.62	4.33	36	32	6	40	72.53	494	2
6	17.03	u18	0.62749	16.4025	circum	3	157.2	56.3	0.182	0.179071	83.6	73.6	5.08	10.51	17.2	2.63	4.61	50	55	9	54	71.07	400	2
7	15.67	u18	-0.0977379	15.7677	circum	2	161.6	50	0.097	0.154703	83.2	78.4	5.91	10.81	17.5	2.63	5.07	36	44	0		77.29	497	1
8	16.21	u18	0.99876	15.2112	circum	2	163.3	60.8	0.133	0.18616	89.2	74.1	5.83	11.59	17.79	2.49	4.94	42	51	5	50	70.47	389	2
9	16.17	u18	0.857469	15.3125	circum	2	166.1	58.6	0.09	0.1764	88.4	77.7	5.51	10.53	16.88	2.94	4.54	40	45	10	51	67.52	420	2
10	12.7	u14	-2.01542	14.7154	pre	2	149.2	37.7	0.148	0.12634	78.6	70.6	6.68	12.19	17.46	2.44	4.72	36	42	4	44	82	442	2
11	11.84	u14	-2.55052	14.3905	pre	1	154.9	39	0.131	0.125888	77.1	77.8	6.76	13.26	18.22	2.59	4.94	35	44	5	48	77	437	2
12	13.13	u14	-1.52445	14.6545	pre	1	158.4	43.5	0.155	0.137311	81.2	77.2	5.81	10.83	17.19	2.72	5.01	36	51	3	66	73	430	1
13	14.43	u14	-1.43845	15.8685	pre	1	149.2	44.8	0.144	0.150134	77	72.2	6.34	11.53	17.81	2.37	5.05	38	54	0	45	80	430	1
14	13.55	u14	-1.80942	15.3594	pre	1	148.6	41	0.078	0.137954	77.1	71.5	5.63	11.05	17.41	2.58	4.92	37	52	7	50	73	408	1
15	11.22	u14	-3.44392	14.6639	pre	1	139	30.6	0.136	0.110072	71	68	6.69	11.76	17.42	2.48	5.16	35	43	1	60	76	425	1
16	14.52	u14	-0.647389	15.1674	circum	1	159.6	51.6	0.133	0.161654	83.1	76.5	7.56	11.39	17.07	2.54	4.93	37	48	7	45	72	374	1
17	12.32	u14	-2.73743	15.0574	pre	2	144	34.8	0.133	0.120833	73.5	70.5	5.85	11.62	17.89	2.27	5.05	35	27	4	45	85	462	1
18	13.46	u14	-1.77889	15.2389	pre	1	149.4	43	0.138	0.143909	77.7	71.7	7.31	11.92	18.18	2.33	5.36	33	44	4	34	88	546	2
19	14.13	u14	-1.07161	15.2016	pre	1	153.5	43.5	0.12	0.141694	81.1	72.4	5.7	10.89	16.88	2.42	5.27	39	32	0	51	78	412	1
20	13.59	u14	-1.43062	15.0206	pre	1	154.9	43.4	0.134	0.14009	80.2	74.7	6.24	11.76	18.16	2.31	5.2	37	30	0	53	80	460	2
21	13.77	u14	-1.9566	15.7266	pre	1	144.1	37.8	0.157	0.131159	75	69.1	6.7	11.43	17.67	2.34	4.72	33	35	1	38	76	398	2
22	11.44	u14	-3.27814	14.7181	pre	1	133.5	28.3	0.149	0.105993	71.8	61.7	7.59	12.9	20.34	1.95	5.77	39	21	0	25	89	437	2
23	13.29	u14	-1.3572	14.6472	pre	1	157.4	48.6	0.116	0.154384	82	75.4	6.76	11.72	17.6	2.55	5.07	33	41	0	45	79	462	2
